# Supplementary material
Source: ML conference proceedings conference paper supplement (https://openaccess.thecvf.com/content/CVPR2024/html/Wang_LightOctree_Lightweight_3D_CVPR_2024_paper.html)
Supplement: Supplementary file 1 [file Wang_LightOctree_Lightweight_3D_CVPR_2024_supplemental.pdf]

# LightOctree: Lightweight 3D Spatially-Coherent Indoor Lighting Estimation

## Supplementary Material

### 001 1. Details in Rendering Layer

002 In this section, we delve into the rendering layer employed  
003 within our framework. Leveraging a multi-level octree for  
004 sparse illumination representation, we have devised a fast  
005 differentiable cone tracing method to render 2D panoramic  
006 environment maps from lighting octree.

007 In classical volume rendering, we calculate the light ra-  
008 diation  $L(s)$  from a viewpoint  $\mathbf{x}$  in direction  $\omega$  using the  
009 rendering equation (Equation 1). The radiance function is  
010 defined as the integral  $L(s)$  of transmittance  $T(t)$ , density  
011  $\sigma(t)$ , and radiance intensity  $L_e(t)$  over the path length  $s$ .

$$012 \quad L(s) = \int_{t=0}^s T(t)\sigma(t)L_e(t)dt \quad (1)$$

013 To solve this equation, we discretize it with a sampling dis-  
014 tance  $\delta_k$  between consecutive sampling points:

$$015 \quad L(s) = \sum_{n=1}^N C_n T_n (1 - e^{-\sigma_n \delta_n}), \quad T_n = e^{-\sum_{k=1}^{n-1} \sigma_k \delta_k} \quad (2)$$

016 We optimize the rendering process with cone tracing to  
017 reduce samples and enhance sampling efficiency, inspired by  
018 prior works [1, 3]. This approach also effectively integrates  
019 multi-scale outputs from the lighting estimation network,  
020 adapting to the characteristics of octree-based networks.

021 Given the angle  $\theta$  of the cone, the sampling position  $s_n$   
022 and sampling step distance  $\delta_n$  of each sampling point are  
023 computed based on the distance traveled and the angle of  
024 the previous point (Equation 3). This approach allows for  
025 more frequent sampling of nearby light sources, enhancing  
026 sensitivity to critical lighting information.

$$027 \quad s_n = \sum_{k=0}^n \delta_k, \quad \delta_n = \begin{cases} c_0, & n = 0 \\ c \cdot s_{n-1} \tan \theta, & n \geq 1 \end{cases} \quad (3)$$

028 Then, by calculating the cone radius at the sampling point  
029 location, we sample octree nodes at depth  $d_n$ :

$$030 \quad d_n = \lceil \log_2 \frac{\delta_n}{l_0} \rceil \quad (4)$$

031 where  $l_0$  illustrate the minimum side length of leaf node  
032 in the octree. Based on these processes, the new rendering  
033 equation can be formulated as equation 5.

$$034 \quad L(s) = \sum_{n=1}^N w_n C_n^{d_n} T_n (1 - e^{-\sigma_n^{d_n} \delta_n}) \quad (5)$$

035 where  $C_n^{d_n}$  and  $\sigma_n^{d_n}$  represents the radiance and density of  
036 sampling point  $n$  at a depth of  $d_n$ . And  $w_n = \delta_n/s_n$  is the  
037 weight for each sampling point.

038 To ensure the differentiability of the above process, we  
039 derive the derivatives of the color and opacity with respect  
040 to the forward rendering process, as shown in equation 6,  
041 where  $E_n = 1 - e^{-\sigma_n^{d_n} \delta_n}$  to simplify the formula.

$$\frac{\partial L(\mathbf{x}, \omega)}{\partial \sigma_t^{d_t}} = w_t C_t^{d_t} T_{t+1} \delta_t - \left[ L(\mathbf{x}, \omega) - \sum_{n=1}^t w_n C_n^{d_n} T_n E_n \right] \delta_t \quad (6) \quad 042$$

$$\frac{\partial L(\mathbf{x}, \omega)}{\partial C_t^{d_t}} = \frac{\partial \left( \sum_{n=1}^N C_n^{d_n} T_n (1 - e^{-\sigma_n^{d_n} \delta_n}) \right)}{\partial C_t^{d_t}} = T_t E_t \quad (7) \quad 044$$

045 The above equations describe how to calculate derivatives  
046 during rendering. The derivatives of color can be computed  
047 during the sampling process, while the derivatives of density  
048 require the use of the final rendering results. Building upon  
049 the derived formulas, we have implemented a differentiable  
050 renderer using Taichi[2], enabling rapid forward rendering  
051 and gradient calculations.

### 052 2. Details in Object Insertion

053 Given that common object representations are typically  
054 meshes, while point clouds are prevalent in AR applica-  
055 tions, and our lighting representation employs a voxel oc-  
056 tree structure, we've devised a fusion rendering method that  
057 seamlessly combines point clouds, meshes, and octrees.

#### 058 2.1. Scene Representation

059 **Background Representation** Differential rendering en-  
060 compasses the rendering of virtual objects and the shading  
061 computation, which requires multiple environment lighting  
062 queries. Each query involves casting a cone from the surface  
063 position  $\mathbf{x}$  into the environment to find radiance incident  
064 from the ray direction (solid angle direction  $w_i$ ). We employ  
065 a point cloud to represent the original scene, including depth  
066 and color information from the viewpoint to the surfaces.  
067 This point cloud is per-pixel, allowing us to skip ray colli-  
068 sions from the viewpoint to the scene surfaces and directly  
069 use the projected depth from the point cloud as the position.  
070 We utilize this information to determine the spatial relation-  
071 ship between the scene and virtual objects. We perform cone  
072 tracing to illuminate the rendered virtual objects.

073 **Virtual Object Representation** To efficiently perform ray  
074 intersections and integrate it into the Taichi framework, we

075 normalizes the bounding boxes of virtual objects to the range  
076 of 0 to 1. For each triangular face, a multi-level regular grid  
077 space division is performed in this three-dimensional space,  
078 which is managed using the SNode structure.

## 079 2.2. Differential Rendering

080 Due to the fact that virtual objects in the scene typically oc-  
081 cupy only a small portion, yet they may consist of thousands  
082 or even tens of thousands of triangles, achieving real-time  
083 rendering with three different data structures in AR applica-  
084 tions requires a new approach to index lookup. During the  
085 ray traversal through the bounding box, we can calculate the  
086 index of the first intersected object grid based on the ray's  
087 origin  $R_o$  and direction  $R_d$ , as shown below:

$$H_{min} = \max \left( \min \left( \frac{Box_{min} - R_o}{R_d}, \frac{Box_{max} - R_o}{R_d} \right) \right)$$

$$I_0 = floor \left( \frac{R_o + R_d H_{min} - Box_{min}}{Box_{size}} \right) \quad (8)$$

088 where  $Box_{min}$  and  $Box_{max}$  represent the coordinates of  
089 the bounding box's vertices, and  $Box_{size}$  represents the size  
090 of the bounding box.  
091

092 In subsequent tracing steps, the index of the next grid  
093 can be obtained based on the ray's current position  $R_t$  and  
094 normalized forward direction  $R'_d$  as follows:

$$R'_t = (1 - R_t) * (R'_d \geq 0) + R_t * (R'_d < 0)$$

$$I_{t+1} = I_t + G \left( \frac{R'_t}{R'_d} \right) * sign(R'_d) \quad (9)$$

096 where  $G(\cdot)$  calculates the axis with the smallest advancement  
097 in the axis directions. For example, if  $G((0.5, 0.2, 0.7)) =$   
098  $(0, 1, 0)$ . During rendering, we emit a ray from the camera  
099 viewpoint for each pixel on the screen and employ ray tracing  
100 to trace it until it intersects with an object. Upon detecting an  
101 intersection, we emit a cone of rays from the object's surface  
102 in various directions based on the surface normal. This cone  
103 of rays is then traced and rendered using ray marching, with  
104 the results obtained from volume rendering serving as the  
105 illumination for surface shading. Same to the rendering layer,  
106 we begin with a minimum step size  $\delta_{min}$  and later perform  
107 long-distance mip-map sampling based on the cone's radius.

108 As the scene is managed using an octree, obtaining the  
109 voxel index directly from the sampling point's position is  
110 not feasible. Therefore, we trace the voxel recursively based  
111 on the current sampling point's location within the volume.  
112 To improve performance, we utilize a shared recursive stack  
113 for all cone rays, modifying the sampling order based on  
114 the ray's direction. Instead of clearing the stack after each  
115 sampling, we continue the recursion in the next sampling, en-  
116 hancing efficiency. Once we determine the sampling point's  
117 position and its associated node, we perform trilinear inter-

polation using the values within the node block, accumulate  
the results along the ray and apply for shading.

## 3. Details in Dataset Construction

120 We train our model using photorealistic renderings of in-  
121 door scenes from the FutureHouse synthetic dataset[4]. This  
122 dataset consists of artist-designed indoor panoramas with  
123 high-quality geometry and HDR environment maps. We can  
124 extract photographs from this dataset to obtain input/output  
125 pairs for training. It is worth mentioning that we chose to  
126 use panorama datasets instead of InteriorNet dataset used  
127 by [5] and [12], or the OpenRoom dataset used by [9] and  
128 [10]. This is because the images in InteriorNet have low  
129 dynamic range, and the resolution of the panoramic data in  
130 OpenRoom is too low. These shortcomings make these two  
131 datasets less ideal for lighting estimation tasks. Although  
132 InteriorVerse proposed by [11] is a better choice, at the time  
133 of writing this paper, the lighting data of this dataset are  
134 still unavailable. Fortunately, with the HDR panoramas and  
135 related geometry information provided by FutureHouse, we  
136 can construct the training data that meets our needs.  
137

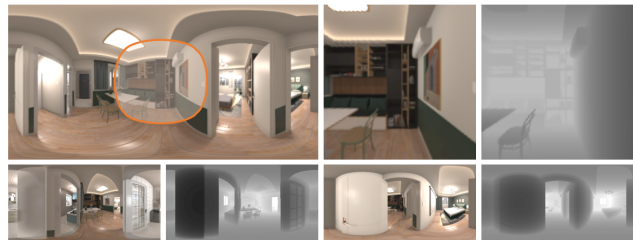

Figure 1. Schematic visualization of the constructed dataset.

Each training sample  $\{I, D, O_s, \{I_{nv}, P_{nv}\}_N\}$  contains  
one LDR perspective image  $I$  as inputs and paired data as  
ground truth to supervise depth and lighting voxel octree.  
The construction process of a single sample is as follows:  
For a perfect 360-degree camera, we can treat its imaging  
plane as a sphere, and any point in world coordinates can be  
projected onto this sphere as a spherical projection. There-  
fore, for each RGB panoramic image and its corresponding  
depth panoramic image in the dataset, we can reproject all  
points onto the world coordinate system using the inverse  
transformation of spherical projection, thus obtaining the 3D  
point cloud of the scene  $\mathcal{P}$ . Based on the 3D point cloud  
 $\mathcal{P}$ , we can construct all the required ground truth. For the  
input image  $I$  and its corresponding depth map  $D$ , we use  
a perspective camera model with a field of view (FOV) of  
90 degrees and an aspect ratio of 1 (similar to what [6] did)  
to reproject points on the sphere onto a cube face, obtaining  
four perspective images that cover a 360-degree horizontal  
view. For the ground truth of the scene's voxel octree, we  
can directly construct it from the point cloud  $\mathcal{P}$  using the  
method introduced by [7, 8]. For the new viewpoint images

159  $\{I_{nv}, P_{nv}\}_N$ , we construct a uniform voxel grid with a res-  
 160 olution of  $256^3$  from the point cloud  $\mathcal{P}$ , and then render  $N$   
 161 HDR panoramic images at locations that are visible in the  
 162 perspective input image  $I$  using a rendering method similar  
 163 to NeRFs. The corresponding camera positions  $P_{nv}$  are also  
 164 recorded during rendering. Based on the 28,579 panoramic  
 165 views from 1,752 house-scale scenes provided by Future-  
 166 House, we construct and select 113,232 pairs of data for  
 167 model training. We use 90% (1,570) of the scenes to train  
 168 our model and reserve 10% (180) for evaluation.

#### 169 4. Additional Details

170 **Bad cases.** Depth estimation inaccuracies may lead to un-  
 171 foreseen outcomes in environments with complex lighting or  
 172 geometry, as depicted in Figure 2. Artifacts observed in both  
 173 Wang et al. and ours are presumably due to erroneous initial  
 174 depth compromising alpha prediction accuracy. However,  
 175 the distant environmental illumination assumption may also  
 176 fail in these scenarios with intense spatially-varying lighting.

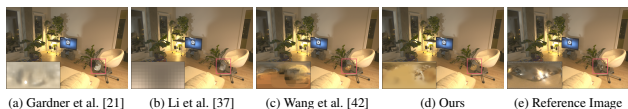

Figure 2. Cases of failure in certain special circumstances.

177 **Data used in user study.** Images are showcased in Figure  
 178 3, where video frames in virtual object insertion results were  
 179 extracted and amalgamated into a single composite image.

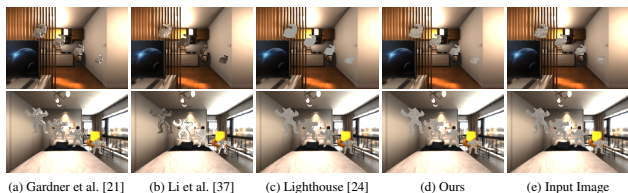

Figure 3. Virtual object insertion examples used in user study.

#### 180 References

181 [1] Cyril Crassin, Fabrice Neyret, Miguel Sainz, Simon Green,  
 182 Elmar Eisemann, and MLeal Llaguno. Interactive indirect  
 183 illumination using voxel cone tracing. *Computer Graphics*  
 184 *Forum*, page 1921–1930, 2011. 1

185 [2] Yuanming Hu, Tzu-Mao Li, Luke Anderson, Jonathan Ragan-  
 186 Kelley, and Frédo Durand. Taichi: a language for high-  
 187 performance computation on spatially sparse data structures.  
 188 *ACM Transactions on Graphics (TOG)*, 38(6):201, 2019. 1

189 [3] Samuli Laine and Tero Karras. Efficient sparse voxel octrees.  
 190 In *Proceedings of the 2010 ACM SIGGRAPH symposium on*  
 191 *Interactive 3D Graphics and Games*, pages 55–63, 2010. 1

192 [4] Zhen Li, Lingli Wang, Xiang Huang, Cihui Pan, and Jiaqi  
 193 Yang. Phyr: Physics-based inverse rendering for panoramic  
 194 indoor images. In *IEEE/CVF Conference on Computer Vision*  
 195 *and Pattern Recognition, CVPR 2022, New Orleans, LA, USA,*  
 196 *June 18-24, 2022*, pages 12703–12713. IEEE, 2022. 2

[5] Pratul P. Srinivasan, Ben Mildenhall, Matthew Tancik,  
 Jonathan T. Barron, Richard Tucker, and Noah Snavely. Light-  
 house: Predicting lighting volumes for spatially-coherent illu-  
 mination. In *2020 IEEE/CVF Conference on Computer Vision*  
*and Pattern Recognition, CVPR 2020, Seattle, WA, USA, June*  
*13-19, 2020*, pages 8077–8086. Computer Vision Foundation  
 / IEEE, 2020. 2

[6] Fu-En Wang, Hou-Ning Hu, Hsien-Tzu Cheng, Juan-Ting  
 Lin, Shang-Ta Yang, Meng-Li Shih, Hung-Kuo Chu, and Min  
 Sun. Self-supervised learning of depth and camera motion  
 from 360 videos. In *Asian Conference on Computer Vision*,  
 pages 53–68. Springer, 2018. 2

[7] Peng-Shuai Wang, Chun-Yu Sun, Yang Liu, and Xin Tong.  
 Adaptive o-cnn: A patch-based deep representation of 3d  
 shapes. *ACM Transactions on Graphics*, page 1–11, 2018. 2

[8] Peng-Shuai Wang, Yang Liu, and Xin Tong. Dual octree  
 graph networks for learning adaptive volumetric shape repre-  
 sentations. *ACM Transactions on Graphics*, page 1–15, 2022.  
 2

[9] Zhengqin Li, Mohammad Shafiei, Ravi Ramamoorthi, Kalyan  
 Sunkavalli, and Manmohan Chandraker. Inverse rendering  
 for complex indoor scenes: Shape, spatially-varying lighting  
 and svbrdf from a single image. In *2020 IEEE/CVF Con-*  
*ference on Computer Vision and Pattern Recognition, CVPR*  
*2020, Seattle, WA, USA, June 13-19, 2020*, pages 2472–2481.  
 Computer Vision Foundation / IEEE, 2020. 2

[10] Zhengqin Li, Ting-Wei Yu, Shen Sang, Sarah Wang, Meng  
 Song, Yuhan Liu, Yu-Ying Yeh, Rui Zhu, Nitesh B. Gun-  
 davarapu, Jia Shi, Sai Bi, Hong-Xing Yu, Zexiang Xu, Kalyan  
 Sunkavalli, Milos Hasan, Ravi Ramamoorthi, and Manmohan  
 Chandraker. Openrooms: An open framework for photoreal-  
 istic indoor scene datasets. In *IEEE Conference on Computer*  
*Vision and Pattern Recognition, CVPR 2021, virtual, June*  
*19-25, 2021*, pages 7190–7199. Computer Vision Foundation  
 / IEEE, 2021. 2

[11] Jingsen Zhu, Fujun Luan, Yuchi Huo, Zihao Lin, Zhihua  
 Zhong, Dianbing Xi, Jiayang Zheng, Rui Tang, Hujun Bao,  
 and Rui Wang. Learning-based inverse rendering of complex  
 indoor scenes with differentiable monte carlo raytracing. In  
*SIGGRAPH Asia, 2022*. 2

[12] Zian Wang, Jonah Philion, Sanja Fidler, and Jan Kautz. Learn-  
 ing indoor inverse rendering with 3d spatially-varying light-  
 ing. In *2021 IEEE/CVF International Conference on Com-*  
*puter Vision, ICCV 2021, Montreal, QC, Canada, October*  
*10-17, 2021*, pages 12518–12527. IEEE, 2021. 2
